# Supplementary material
Source: Springer Nature journal article supplement (https://www.springermedizin.de/resource/supplementary/12885_2013_4354_MOESM4_ESM.pdf/9466088)
Supplement: MOESM4 [file 9466088]

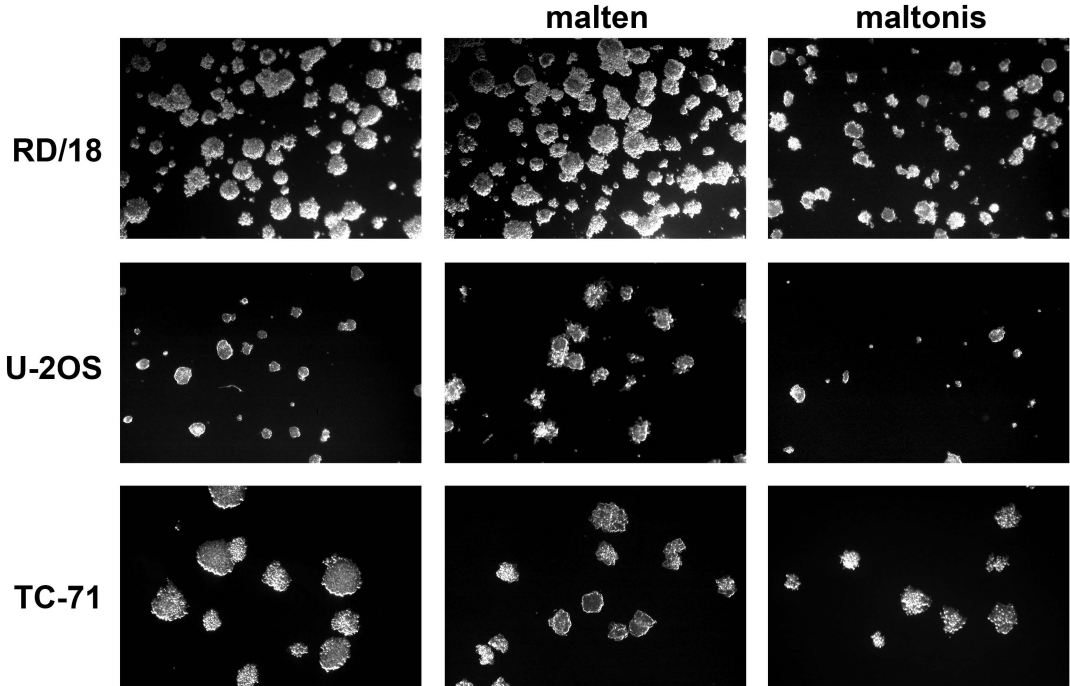

#### **Additional file 4**

Representative images of anchorage independent growth of RMS, OS and ES with or without malten (30 $\mu$ M) and maltonis (10 $\mu$ M). Magnification x40.
